# Supplementary material for: Ginsenoside Rh2 stimulates the production of mitochondrial reactive oxygen species and induces apoptosis of cervical cancer cells by inhibiting mitochondrial electron transfer chain complex
Source: PubMed Central journal article supplement — Mol Med Rep. 2021 Oct 28;24(6):873. doi: 10.3892/mmr.2021.12513 (PMC8569524; doi:10.3892/mmr.2021.12513), 2021-10-28
Supplement: Supplementary_Data.pdf [file Supplementary_Data.pdf]

Figure S1. Treatment with G-Rh2 induced almost no death in End1/e6e7 cells. Flow cytometry was used to detect the apoptotic rate of End1/e6e7 cells after G-Rh2 treatment. The early apoptotic rate was quantified by IDEAS software v6.1. Data are presented as the mean  $\pm$  standard deviation of three independent experiments and were analyzed by one-way ANOVA followed by Dunnet's post-hoc test. ns >0.05 vs. control, indicated no statistically significant difference. G-Rh2, ginsenoside Rh2; ns, not significant.

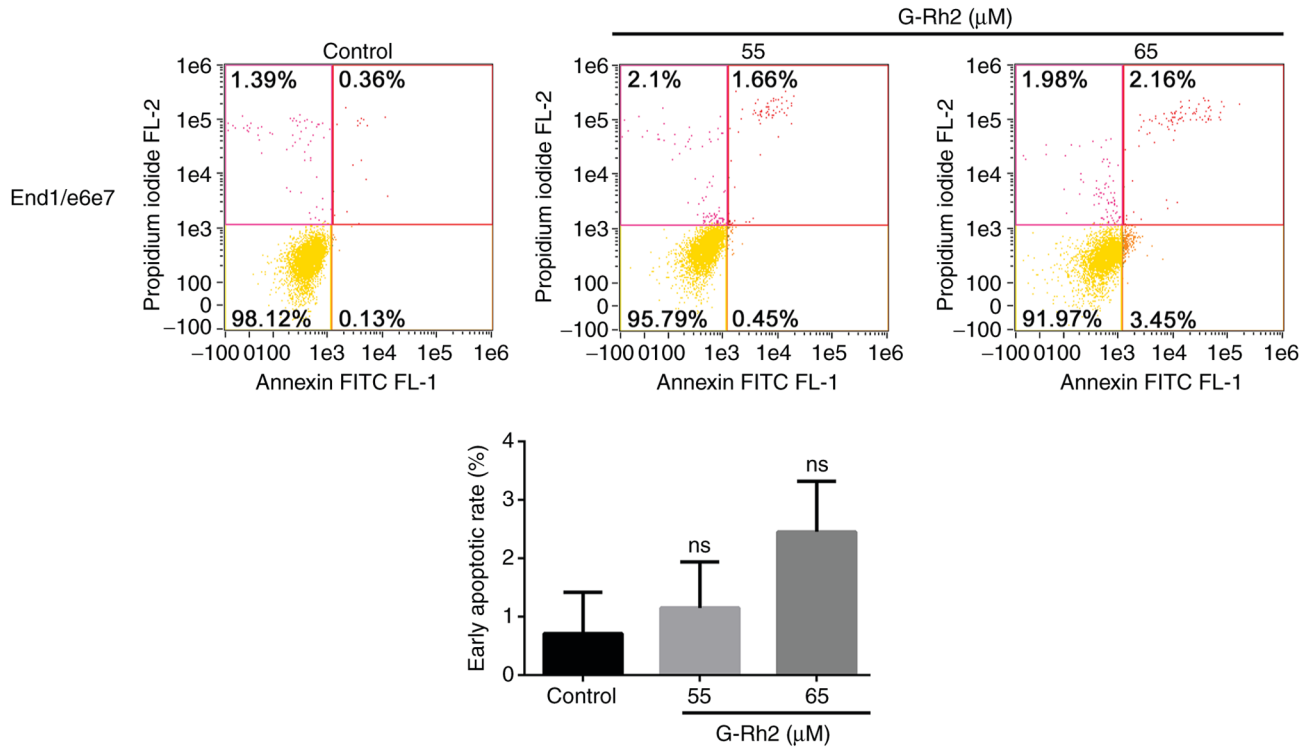

Figure S2. Greater inhibition of mitochondrial OXPHOS than of glycolysis in HeLa cells exposed to G-Rh2. (A) OCR curves after G-Rh2 treatment, as measured by the Seahorse XFp Mitochondrial Stress Test Kit. (B) Related indicators of mitochondrial OXPHOS including basal OCR, ATP-linked, proton leak, maximal OCR and reserve capacity after G-Rh2 treatment were calculated according to the OCR curves. (C) Curves of ECAR rates after G-Rh2 treatment, as detected by the Seahorse XFp Glycolysis Stress Test Kit. (D) Related indicators of glycolysis including glycolysis, glycolytic reserve and glycolytic capacity after G-Rh2 treatment were calculated according to the ECAR curves. The histograms were created separately but then plotted together. Data are presented as the mean  $\pm$  standard deviation of three independent experiments and were analyzed by one-way ANOVA followed by Dunnet's post-hoc test. \* $P < 0.05$ ; \*\* $P < 0.01$ ; \*\*\* $P < 0.001$  vs. control. G-Rh2, ginsenoside Rh2; MMP, mitochondrial membrane potential; mtROS, mitochondrial reactive oxygen species; OCR, oxygen consumption rate; ECAR, extracellular acidification rate; OXPHOS, oxidative phosphorylation; FCCP, carbonyl cyanide-4-(trifluoromethoxy) phenylhydrazone; rot, rotenone (ETC complex I inhibitor); AA, antimycin A (ETC complex III inhibitor); 2-DG, 2-deoxy-d-glucose (glycolysis inhibitor); ETC, electron transport chain.

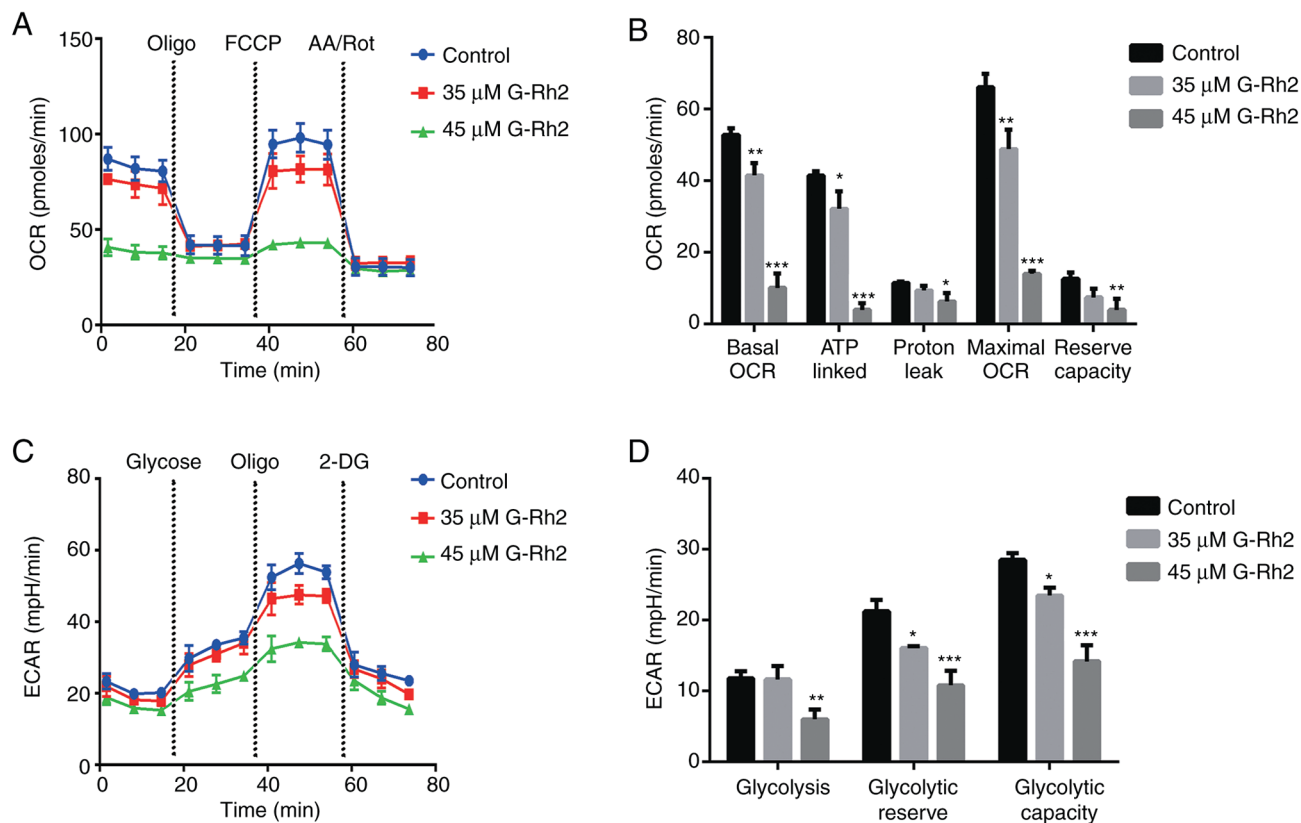

Table SI. Primer sequences used in the study.

| Primer purpose/direction                 | Sequence (5'-3')               | Enzyme         |
|------------------------------------------|--------------------------------|----------------|
| pET28a (+)-6xHis-ATP5F1B<br>construction |                                |                |
| Sense                                    | CGAGCTCGCGCAAACATCTCCTTCGC     | <i>SacI</i>    |
| Antisense                                | CCAAGCTTTCACGATGAATGCTCTTC     | <i>HindIII</i> |
| pCMV-myc-UQCRC1<br>construction          |                                |                |
| Sense                                    | GGAATTCTAATGGCGGGCGTCCGTGG     | <i>EcoRI</i>   |
| Antisense                                | GGTACCCTAGAAGCGCAGCCAGAAC      | <i>KpnI</i>    |
| pCMV-10-Flag-NDUFS1<br>construction      |                                |                |
| Sense                                    | ATAAGAATGCGGCCGCTATGTTAAGGATAC | <i>NotI</i>    |
| Antisense                                | GGATCCTCAGCATATGGATGGTTCC      | <i>BamHI</i>   |
